# Supplementary material
Source: publisher figshare collection journal article supplement (https://acs.figshare.com/articles/dataset/_/3345463)
Supplement: Supplementary file 1 [file 1]

Dimolybdenum(III) Complexes of −OSi(OtBu)3,
−O2P(OtBu)2, and −OB[OSi(OtBu)3]2 as Single-Source
Molecular Precursors to Molybdenum-Containing,
Multi-Component Oxide Materials 

Browse

Browse and SearchSearch

Explore more content

cm030563k\_si\_009.pdf (313.61 kB)

File infoThis item contains files with download restrictions

Fullscreen

# Dimolybdenum(III) Complexes of −OSi(O*t*Bu)3, −O2P(O*t*Bu)2, and −OB[OSi(O*t*Bu)3]2 as Single-Source Molecular Precursors to Molybdenum-Containing, Multi-Component Oxide Materials

CiteDownload (313.61 kB)ShareEmbed

journal contribution

 posted on 2004-03-23, 00:00 authored by Kyle L. Fujdala, T. Don Tilley

The following dimolybdenum complexes containing −OSi(O*t*Bu)3, −O2P(O*t*Bu)2, and −OB[OSi(O*t*Bu)3]2 ligands have been synthesized and structurally characterized:  Mo2(NMe2)4[OSi(O*t*Bu)3]2 (**1**), Mo2(O*t*Bu)4[OSi(O*t*Bu)3]2 (**2**), Mo2(NMe)4{OB[OSi(O*t*Bu)3]2}2 (**3**), Mo2(NMe2)2[μ-O2P(O*t*Bu)2]2[O2P(O*t*Bu)2]2 (**4**), Mo2(NMe2)2[OSi(O*t*Bu)3]2[μ-O2P(O*t*Bu)2]2 (**5**), and Mo2(NMe2)2[μ-O2P(O*t*Bu)2]2{OB[OSi(O*t*Bu)3]2}2 (**6**). The isolation and structural characterization of trans-
and cis-isomers of complexes **4** and **5** (**4a** and **4b**, **5a** and **5b**, respectively) are also reported.
Studies of the thermal decompositions of the complexes (by thermogravimetric analysis and
solution 1H NMR spectroscopy) were performed. Xerogels with approximate compositions of
2MoO1.5·2P2O5 and 2MoO1.5·2P2O5·2SiO2 were derived from **4a** and **5a** or **5b**, respectively,
via solution thermolyses (toluene). The as-synthesized (and dried) xerogels contain one equiv
of HNMe2 per molybdenum center (by combustion analysis, IR spectroscopy, and thermogravimetric analysis), and these materials have high surface areas (up to 270 m2 g-1). Upon
calcination at 300 °C, the coordinated amines are lost and the surface areas are significantly
reduced (to 40 m2 g-1 and <5 m2 g-1 for the materials derived from **4** and **5a** or **5b**,
respectively). Solid-state 31P MAS NMR spectroscopy suggests that the as-synthesized
xerogels retain structural features of the starting molecular precursors, as indicated by the
presence of resonances that correspond to both bridging and terminal −O2P(O*t*Bu)2 ligands.
Upon calcination at 300 °C, the resonances for bridging −O2P(O*t*Bu)2 groups are replaced
by those for PO43-. The material derived from **4** exhibits low activity and poor selectivity for
the oxidative dehydrogenation (ODH) of propane to propylene. Cothermolyses of **4** and Bi[OSi(O*t*Bu)3]3 resulted in formation of Bi/Mo/P/Si/O materials with improved performance
for the ODH of propane.

## History

## Usage metrics


## Categories

- Biochemistry
- Physical Sciences not elsewhere classified
- Medicine
- Cell Biology
- Molecular Biology
- Biotechnology
- Chemical Sciences not elsewhere classified
- Marine Biology
- Cancer
- Computational Biology

## Keywords

MASsurface areasPO2 ligandsOBO t Bu40 m 2 g270 m 2 gODHNMe 25 bsolution 1 H NMR spectroscopyIR

## Licence

CC BY-NC 4.0

## Exports

Select an option

RefWorksRefWorks

BibTeXBibTeX

Ref. managerRef. manager

EndnoteEndnote

DataCiteDataCite

NLMNLM

DCDC

Hide footer

AboutFeaturesToolsBlogKnowledgeContactHelpPrivacy PolicyCookie PolicyTermsDisclaimerSitemap

fig**share**. credit for  **all**  your research.
